# Supplementary material for: Influence of Flow Rate, Particle Size, and Temperature on Espresso Extraction Kinetics
Source: MDPI journal article supplement (doi:10.3390/foods12152871), 2023-07-28

## Response Surface Fit by OriginPro

This file contains the result sheets of the response surface fittings based on the reduced linear regression for the components trigonelline, caffeine, 5-caffeoylquinic acid (V-CQA) and Total Dissolved Solids (TDS) for Ristretto (Ris, brew ration 1/1), Espresso (Esp, brew ratio 1/2) and Espresso Lungo (Lungo, brew ration 1/3). The response surface is based on the factors flow rate(A) with a range from 1.0 mL s<sup>-1</sup> to 3.0 mL s<sup>-1</sup>, grinding level (B) with a range from 1.4 to 2.0 and temperature (C) from 80 °C to 98 °C. For the evaluation in OriginPro the factor ranges were translated to the interval [-1, 1]. The following result sheets include the coded coefficients for the response surface, R<sup>2</sup> statistics and ANOVA as well as the fitted plot, residual plots, effect plots and main/interaction plots.

### Table of Content:

|                                      |    |
|--------------------------------------|----|
| 1. Trigonelline response surface fit |    |
| 1.1. for ristretto                   | 1  |
| 1.2. for espresso                    | 2  |
| 1.3. for espresso lungo              | 3  |
| 2. Caffeine                          |    |
| 2.1. for ristretto                   | 4  |
| 2.2. for espresso                    | 5  |
| 2.3. for espresso lungo              | 6  |
| 3. 5-caffeoylquinic acid (V-CQA)     |    |
| 3.1. for ristretto                   | 7  |
| 3.2. for espresso                    | 8  |
| 3.3. for espresso lungo              | 9  |
| 4. Total Dissolved Solids (TDS)      |    |
| 4.1. for ristretto                   | 10 |
| 4.2. for espresso                    | 11 |
| 4.3. for espresso lungo              | 12 |

# 1.1 Trigonelline - Ristretto

## Coded Coefficients

|             | Value    | Standard Error | 95% LCL  | 95% UCL  | t-Value   | Prob >  t   |
|-------------|----------|----------------|----------|----------|-----------|-------------|
| (Intercept) | 77.25365 | 0.62006        | 76.00142 | 78.50589 | 224.06896 | 5.96466E-65 |
| A           | -3.6636  | 0.47169        | -4.6162  | -2.71099 | -10.62601 | 2.39635E-13 |
| B           | 2.13968  | 0.4408         | 1.24947  | 3.0299   | 6.20601   | 2.20316E-7  |
| C           | 1.48397  | 0.50387        | 0.46638  | 2.50155  | 4.30414   | 1.016E-4    |
| B*B         | -2.78605 | 0.79483        | -4.39124 | -1.18085 | -8.08073  | 5.13877E-10 |
| C*C         | 2.11142  | 0.83376        | 0.42761  | 3.79522  | 6.12402   | 2.88199E-7  |
| A*B         | 0.97216  | 0.52814        | -0.09444 | 2.03875  | 2.81968   | 0.00737     |

## Statistics

|                           | Trigonellin_mass_in_Ristretto |
|---------------------------|-------------------------------|
| Degress of Freedom        | 41                            |
| Root Mean Square of Error | 2.38868                       |
| R-Square                  | 0.70652                       |
| Adj. R-Square             | 0.66358                       |
| Residual Sums of Squares  | 233.93747                     |
| Predicted. R-Square       | 0.5923                        |

## ANOVA

|       | DF | Sum of Squares | Mean Square | F Value  | Prob>F     |
|-------|----|----------------|-------------|----------|------------|
| A     | 1  | 322.40718      | 322.40718   | 56.50525 | 3.09963E-9 |
| B     | 1  | 124.86871      | 124.86871   | 21.88455 | 3.13869E-5 |
| C     | 1  | 21.45691       | 21.45691    | 3.76055  | 0.05938    |
| B*B   | 1  | 38.60104       | 38.60104    | 6.76524  | 0.01287    |
| C*C   | 1  | 36.52088       | 36.52088    | 6.40067  | 0.01534    |
| A*B   | 1  | 19.33286       | 19.33286    | 3.38829  | 0.07291    |
| Error | 41 | 233.93747      | 5.70579     |          |            |
| Total | 47 | 797.12505      |             |          |            |

## Fitted Plot

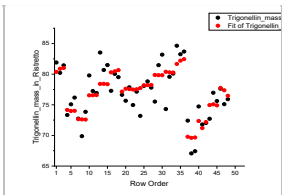

## Residual Plot

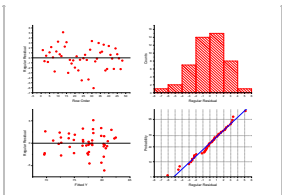

## Effects Plot

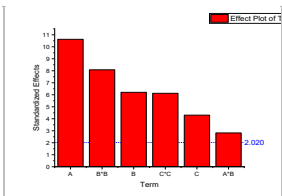

## Main Effects Plot

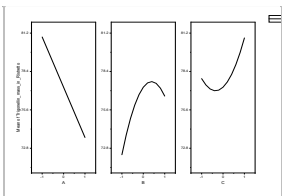

## 2-way Interaction Plot

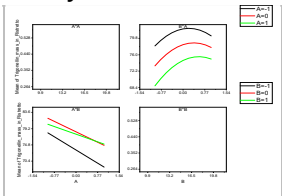

# 1.2 Trigonelline - Espresso

## Coded Coefficients

|             | Value    | Standard Error | 95% LCL  | 95% UCL  | t-Value   | Prob >  t   |
|-------------|----------|----------------|----------|----------|-----------|-------------|
| (Intercept) | 99.42477 | 0.84951        | 97.70785 | 101.1417 | 210.65853 | 1.52209E-62 |
| A           | -3.20914 | 0.65288        | -4.52865 | -1.88963 | -6.79944  | 3.57107E-8  |
| B           | 3.1912   | 0.60441        | 1.96965  | 4.41275  | 6.76144   | 4.03563E-8  |
| C           | 2.33129  | 0.69319        | 0.9303   | 3.73228  | 4.93948   | 1.43558E-5  |
| B*B         | -4.30238 | 1.08902        | -6.50338 | -2.10138 | -9.11577  | 2.5996E-11  |
| C*C         | 2.2806   | 1.14561        | -0.03476 | 4.59596  | 4.83208   | 2.01876E-5  |
| A*B         | 1.4759   | 0.72379        | 0.01307  | 2.93873  | 3.12711   | 0.00329     |
| A*C         | -1.60313 | 0.7496         | -3.11813 | -0.08813 | -3.39667  | 0.00155     |

## Statistics

|                           | Trigonellin_mass_in_Espresso |
|---------------------------|------------------------------|
| Degress of Freedom        | 40                           |
| Root Mean Square of Error | 3.26991                      |
| R-Square                  | 0.66052                      |
| Adj. R-Square             | 0.60111                      |
| Residual Sums of Squares  | 427.69322                    |
| Predicted. R-Square       | 0.48749                      |

## ANOVA

|       | DF | Sum of Squares | Mean Square | F Value  | Prob>F     |
|-------|----|----------------|-------------|----------|------------|
| A     | 1  | 197.9553       | 197.9553    | 18.51377 | 1.05685E-4 |
| B     | 1  | 284.78395      | 284.78395   | 26.63441 | 7.08211E-6 |
| C     | 1  | 96.55504       | 96.55504    | 9.03031  | 0.00457    |
| B*B   | 1  | 119.82019      | 119.82019   | 11.20618 | 0.00178    |
| C*C   | 1  | 35.04261       | 35.04261    | 3.27736  | 0.07776    |
| A*B   | 1  | 49.08811       | 49.08811    | 4.59096  | 0.03828    |
| A*C   | 1  | 48.90461       | 48.90461    | 4.5738   | 0.03862    |
| Error | 40 | 427.69322      | 10.69233    |          |            |
| Total | 47 | 1259.84304     |             |          |            |

## Fitted Plot

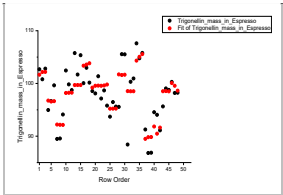

## Residual Plot

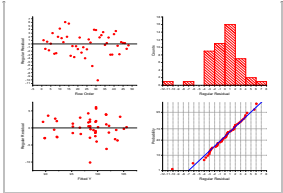

## Effects Plot

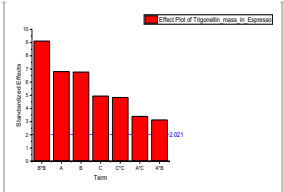

## Main Effects Plot

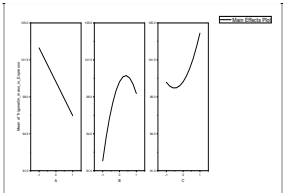

## 2-way Interaction Plot

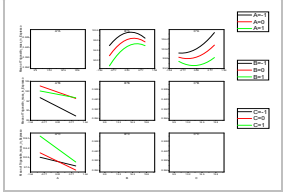

# 1.3 Trigonelline - Espresso Lungo

## Coded Coefficients

|             | Value     | Standard Error | 95% LCL  | 95% UCL   | t-Value   | Prob >  t   |
|-------------|-----------|----------------|----------|-----------|-----------|-------------|
| (Intercept) | 105.80572 | 0.96089        | 103.8637 | 107.74774 | 198.19396 | 1.74401E-61 |
| A           | -2.66583  | 0.73847        | -4.15834 | -1.17332  | -4.9936   | 1.20841E-5  |
| B           | 3.62049   | 0.68365        | 2.23878  | 5.00219   | 6.78185   | 3.77902E-8  |
| C           | 2.68034   | 0.78407        | 1.09567  | 4.26501   | 5.02078   | 1.10811E-5  |
| B*B         | -4.8757   | 1.2318         | -7.36526 | -2.38614  | -9.1331   | 2.46816E-11 |
| C*C         | 2.19587   | 1.2958         | -0.42305 | 4.81479   | 4.11328   | 1.88745E-4  |
| A*B         | 1.71388   | 0.81868        | 0.05926  | 3.36849   | 3.21041   | 0.00261     |
| A*C         | -2.11514  | 0.84788        | -3.82876 | -0.40151  | -3.96205  | 2.98058E-4  |

## Statistics

|                           | Trigonellin_mass_in_Lungo |
|---------------------------|---------------------------|
| Degress of Freedom        | 40                        |
| Root Mean Square of Error | 3.69862                   |
| R-Square                  | 0.64106                   |
| Adj. R-Square             | 0.57824                   |
| Residual Sums of Squares  | 547.19063                 |
| Predicted. R-Square       | 0.45445                   |

## ANOVA

|       | DF | Sum of Squares | Mean Square | F Value  | Prob>F     |
|-------|----|----------------|-------------|----------|------------|
| A     | 1  | 115.30154      | 115.30154   | 8.42862  | 0.00598    |
| B     | 1  | 366.30049      | 366.30049   | 26.77681 | 6.77638E-6 |
| C     | 1  | 145.92848      | 145.92848   | 10.66747 | 0.00224    |
| B*B   | 1  | 167.49235      | 167.49235   | 12.2438  | 0.00116    |
| C*C   | 1  | 30.05441       | 30.05441    | 2.197    | 0.14612    |
| A*B   | 1  | 67.04872       | 67.04872    | 4.90131  | 0.0326     |
| A*C   | 1  | 85.13146       | 85.13146    | 6.22317  | 0.01684    |
| Error | 40 | 547.19063      | 13.67977    |          |            |
| Total | 47 | 1524.44808     |             |          |            |

## Fitted Plot

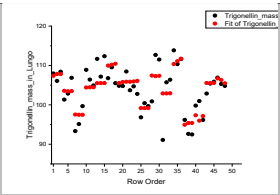

## Residual Plot

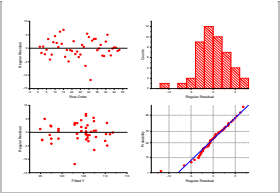

## Effects Plot

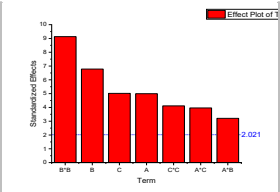

## Main Effects Plot

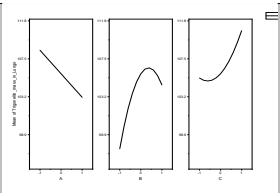

## 2-way Interaction Plot

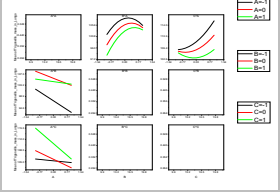

# 2.1 Caffeine - Ristretto

## Coded Coefficients

|             | Value     | Standard Error | 95% LCL  | 95% UCL   | t-Value   | Prob >  t   |
|-------------|-----------|----------------|----------|-----------|-----------|-------------|
| (Intercept) | 130.92848 | 1.05251        | 128.8029 | 133.05406 | 223.71955 | 6.35867E-65 |
| A           | -4.46659  | 0.80067        | -6.08357 | -2.8496   | -7.63213  | 2.14247E-9  |
| B           | -0.26118  | 0.74823        | -1.77227 | 1.24991   | -0.44628  | 0.65774     |
| C           | 3.36105   | 0.85529        | 1.63376  | 5.08834   | 5.74308   | 1.00324E-6  |
| B*B         | -3.46066  | 1.34918        | -6.18538 | -0.73595  | -5.91329  | 5.74752E-7  |
| C*C         | 1.80262   | 1.41525        | -1.05553 | 4.66077   | 3.08017   | 0.00369     |
| A*B         | 1.65553   | 0.89648        | -0.15494 | 3.46601   | 2.82883   | 0.0072      |

## Statistics

|                           | Caffeine_mass_in_Ristretto |
|---------------------------|----------------------------|
| Degress of Freedom        | 41                         |
| Root Mean Square of Error | 4.05463                    |
| R-Square                  | 0.56785                    |
| Adj. R-Square             | 0.50461                    |
| Residual Sums of Squares  | 674.03971                  |
| Predicted. R-Square       | 0.40249                    |

## ANOVA

|       | DF | Sum of Squares | Mean Square | F Value  | Prob>F     |
|-------|----|----------------|-------------|----------|------------|
| A     | 1  | 497.86186      | 497.86186   | 30.28358 | 2.19685E-6 |
| B     | 1  | 6.72072        | 6.72072     | 0.4088   | 0.52613    |
| C     | 1  | 220.79343      | 220.79343   | 13.43026 | 7.0356E-4  |
| B*B   | 1  | 77.6838        | 77.6838     | 4.72529  | 0.03555    |
| C*C   | 1  | 26.56816       | 26.56816    | 1.61607  | 0.21081    |
| A*B   | 1  | 56.06556       | 56.06556    | 3.41032  | 0.07202    |
| Error | 41 | 674.03971      | 16.43999    |          |            |
| Total | 47 | 1559.73324     |             |          |            |

## Fitted Plot

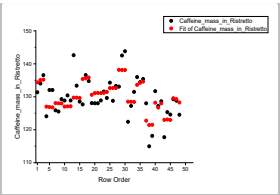

## Residual Plot

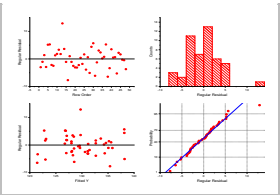

## Effects Plot

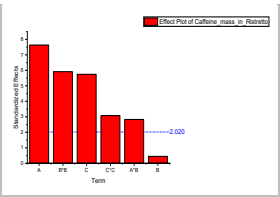

## Main Effects Plot

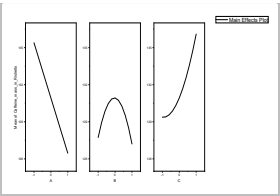

## 2-way Interaction Plot

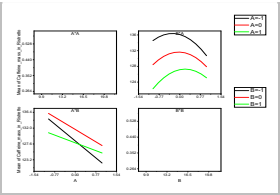

# 2.2 Caffeine - Espresso

## Coded Coefficients

|             | Value     | Standard Error | 95% LCL   | 95% UCL   | t-Value   | Prob >  t   |
|-------------|-----------|----------------|-----------|-----------|-----------|-------------|
| (Intercept) | 185.61236 | 1.35352        | 182.87886 | 188.34586 | 225.44543 | 4.64046E-65 |
| A           | -2.70581  | 1.13856        | -5.00517  | -0.40644  | -3.28648  | 0.00208     |
| B           | -0.01655  | 1.05387        | -2.14488  | 2.11177   | -0.02011  | 0.98406     |
| C           | 4.9825    | 1.0906         | 2.77999   | 7.185     | 6.05176   | 3.65184E-7  |
| B*B         | -4.35365  | 1.70167        | -7.79025  | -0.91705  | -5.28796  | 4.4223E-6   |
| A*B         | 2.27177   | 1.26258        | -0.27807  | 4.8216    | 2.7593    | 0.00862     |
| A*C         | -1.87045  | 1.30275        | -4.50141  | 0.76051   | -2.27185  | 0.02841     |

## Statistics

|                           | Caffeine_mass_in_Espresso |
|---------------------------|---------------------------|
| Degress of Freedom        | 41                        |
| Root Mean Square of Error | 5.70409                   |
| R-Square                  | 0.48432                   |
| Adj. R-Square             | 0.40885                   |
| Residual Sums of Squares  | 1334.00052                |
| Predicted. R-Square       | 0.26355                   |

## ANOVA

|       | DF | Sum of Squares | Mean Square | F Value  | Prob>F     |
|-------|----|----------------|-------------|----------|------------|
| A     | 1  | 132.19427      | 132.19427   | 4.06294  | 0.05042    |
| B     | 1  | 2.52931        | 2.52931     | 0.07774  | 0.78179    |
| C     | 1  | 735.01171      | 735.01171   | 22.59031 | 2.47408E-5 |
| B*B   | 1  | 202.37838      | 202.37838   | 6.22002  | 0.01676    |
| A*B   | 1  | 113.67839      | 113.67839   | 3.49386  | 0.06875    |
| A*C   | 1  | 67.07184       | 67.07184    | 2.06143  | 0.15865    |
| Error | 41 | 1334.00052     | 32.5366     |          |            |
| Total | 47 | 2586.86442     |             |          |            |

## Fitted Plot

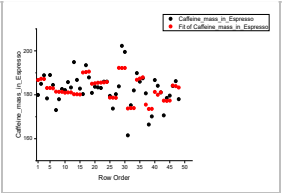

## Residual Plot

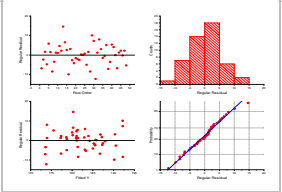

## Effects Plot

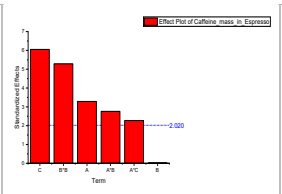

## Main Effects Plot

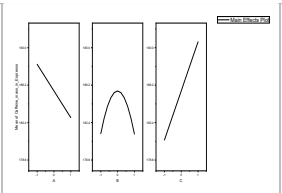

## 2-way Interaction Plot

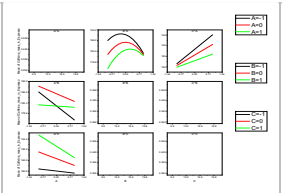

# 2.3 Caffeine - Espresso Lungo

## Coded Coefficients

|             | Value     | Standard Error | 95% LCL   | 95% UCL   | t-Value   | Prob >  t   |
|-------------|-----------|----------------|-----------|-----------|-----------|-------------|
| (Intercept) | 208.17047 | 1.60437        | 204.93037 | 211.41056 | 213.31173 | 4.48096E-64 |
| A           | -0.38506  | 1.34957        | -3.11056  | 2.34044   | -0.39457  | 0.69521     |
| B           | 0.21677   | 1.24918        | -2.306    | 2.73955   | 0.22213   | 0.82532     |
| C           | 6.15691   | 1.29272        | 3.54621   | 8.7676    | 6.30897   | 1.57247E-7  |
| B*B         | -5.35806  | 2.01704        | -9.43156  | -1.28455  | -5.49039  | 2.28944E-6  |
| A*B         | 2.52729   | 1.49657        | -0.4951   | 5.54968   | 2.58971   | 0.01324     |
| A*C         | -3.09214  | 1.54419        | -6.21069  | 0.02642   | -3.16851  | 0.00289     |

## Statistics

|                           | Caffeine_mass_in_Lungo |
|---------------------------|------------------------|
| Degress of Freedom        | 41                     |
| Root Mean Square of Error | 6.76122                |
| R-Square                  | 0.48987                |
| Adj. R-Square             | 0.41522                |
| Residual Sums of Squares  | 1874.2773              |
| Predicted. R-Square       | 0.26046                |

## ANOVA

|       | DF | Sum of Squares | Mean Square | F Value  | Prob>F     |
|-------|----|----------------|-------------|----------|------------|
| A     | 1  | 1.86271        | 1.86271     | 0.04075  | 0.84103    |
| B     | 1  | 0.11445        | 0.11445     | 0.0025   | 0.96034    |
| C     | 1  | 1161.68375     | 1161.68375  | 25.41195 | 9.82833E-6 |
| B*B   | 1  | 307.20602      | 307.20602   | 6.72016  | 0.01315    |
| A*B   | 1  | 145.69842      | 145.69842   | 3.18717  | 0.08162    |
| A*C   | 1  | 183.30158      | 183.30158   | 4.00974  | 0.05188    |
| Error | 41 | 1874.2773      | 45.71408    |          |            |
| Total | 47 | 3674.14423     |             |          |            |

## Fitted Plot

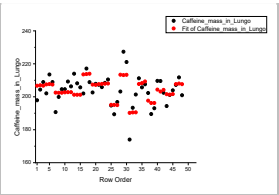

## Residual Plot

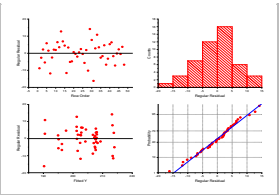

## Effects Plot

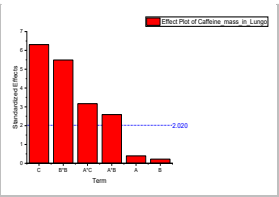

## Main Effects Plot

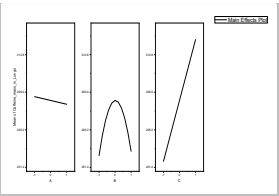

## 2-way Interaction Plot

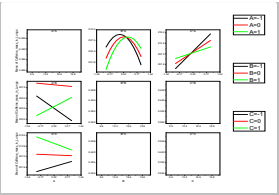

# 3.1 5-CQA - Ristretto

## Coded Coefficients

|             | Value    | Standard Error | 95% LCL  | 95% UCL  | t-Value   | Prob >  t   |
|-------------|----------|----------------|----------|----------|-----------|-------------|
| (Intercept) | 86.58208 | 0.70892        | 85.15038 | 88.01377 | 219.64755 | 1.35008E-64 |
| A           | -4.66192 | 0.53929        | -5.75105 | -3.5728  | -11.82669 | 8.54728E-15 |
| B           | 2.27386  | 0.50397        | 1.25606  | 3.29166  | 5.76849   | 9.23222E-7  |
| C           | 2.46971  | 0.57608        | 1.30629  | 3.63313  | 6.26534   | 1.814E-7    |
| B*B         | -1.47767 | 0.90874        | -3.31291 | 0.35757  | -3.74866  | 5.49275E-4  |
| C*C         | 0.91814  | 0.95324        | -1.00698 | 2.84325  | 2.3292    | 0.02486     |
| A*B         | 0.99767  | 0.60383        | -0.22178 | 2.21712  | 2.53097   | 0.01531     |

## Statistics

|                           | V_CQA_mass_in_Ristretto |
|---------------------------|-------------------------|
| Degress of Freedom        | 41                      |
| Root Mean Square of Error | 2.731                   |
| R-Square                  | 0.73098                 |
| Adj. R-Square             | 0.69162                 |
| Residual Sums of Squares  | 305.79357               |
| Predicted. R-Square       | 0.63676                 |

## ANOVA

|       | DF | Sum of Squares | Mean Square | F Value  | Prob>F      |
|-------|----|----------------|-------------|----------|-------------|
| A     | 1  | 521.48022      | 521.48022   | 69.9187  | 2.12244E-10 |
| B     | 1  | 136.47952      | 136.47952   | 18.29882 | 1.10281E-4  |
| C     | 1  | 133.38332      | 133.38332   | 17.88369 | 1.28256E-4  |
| B*B   | 1  | 12.32795       | 12.32795    | 1.6529   | 0.20578     |
| C*C   | 1  | 6.88746        | 6.88746     | 0.92345  | 0.3422      |
| A*B   | 1  | 20.36093       | 20.36093    | 2.72994  | 0.10612     |
| Error | 41 | 305.79357      | 7.45838     |          |             |
| Total | 47 | 1136.71297     |             |          |             |

## Fitted Plot

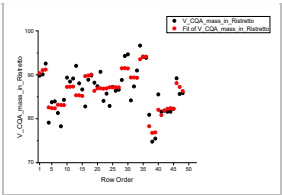

## Residual Plot

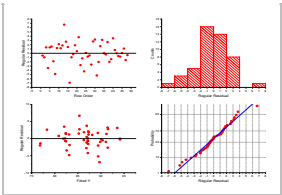

## Effects Plot

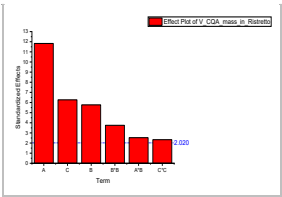

## Main Effects Plot

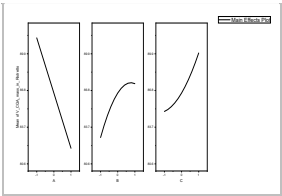

## 2-way Interaction Plot

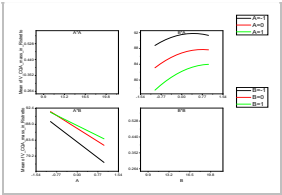



# 3.2 5-CQA - Espresso

## Coded Coefficients

|             | Value     | Standard Error | 95% LCL   | 95% UCL   | t-Value   | Prob >  t   |
|-------------|-----------|----------------|-----------|-----------|-----------|-------------|
| (Intercept) | 119.74944 | 0.93417        | 117.86285 | 121.63603 | 210.74146 | 7.36455E-64 |
| A           | -4.52782  | 0.7858         | -6.11478  | -2.94086  | -7.96829  | 7.33663E-10 |
| B           | 3.64304   | 0.72735        | 2.17413   | 5.11196   | 6.41122   | 1.12512E-7  |
| C           | 3.45763   | 0.7527         | 1.93752   | 4.97774   | 6.08492   | 3.27592E-7  |
| B*B         | -2.161    | 1.17445        | -4.53285  | 0.21085   | -3.80304  | 4.67343E-4  |
| A*B         | 1.49069   | 0.8714         | -0.26913  | 3.25052   | 2.6234    | 0.01217     |
| A*C         | -1.61154  | 0.89912        | -3.42736  | 0.20428   | -2.83607  | 0.00706     |

## Statistics

|                           | V_CQA_mass_in_Espresso |
|---------------------------|------------------------|
| Degress of Freedom        | 41                     |
| Root Mean Square of Error | 3.93681                |
| R-Square                  | 0.66964                |
| Adj. R-Square             | 0.62129                |
| Residual Sums of Squares  | 635.4364               |
| Predicted. R-Square       | 0.55179                |

## ANOVA

|       | DF | Sum of Squares | Mean Square | F Value  | Prob>F     |
|-------|----|----------------|-------------|----------|------------|
| A     | 1  | 415.2352       | 415.2352    | 26.79205 | 6.35428E-6 |
| B     | 1  | 361.37871      | 361.37871   | 23.31709 | 1.94228E-5 |
| C     | 1  | 362.67638      | 362.67638   | 23.40082 | 1.88924E-5 |
| B*B   | 1  | 48.88507       | 48.88507    | 3.15419  | 0.08315    |
| A*B   | 1  | 50.06604       | 50.06604    | 3.23039  | 0.07965    |
| A*C   | 1  | 49.78851       | 49.78851    | 3.21248  | 0.08046    |
| Error | 41 | 635.4364       | 15.49845    |          |            |
| Total | 47 | 1923.46631     |             |          |            |

## Fitted Plot

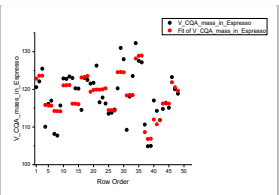

## Residual Plot

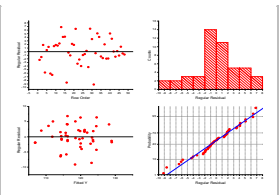

## Effects Plot

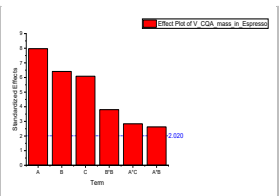

## Main Effects Plot

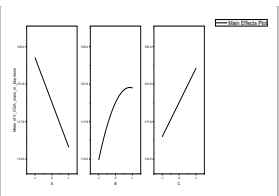

## 2-way Interaction Plot

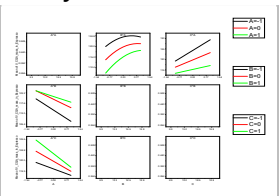

### 3.3 5-CQA - Espresso Lungo

#### Coded Coefficients

|             | Value     | Standard Error | 95% LCL   | 95% UCL   | t-Value   | Prob >  t   |
|-------------|-----------|----------------|-----------|-----------|-----------|-------------|
| (Intercept) | 132.18312 | 1.11655        | 129.92821 | 134.43803 | 194.62529 | 1.91887E-62 |
| A           | -3.98835  | 0.93922        | -5.88514  | -2.09156  | -5.87241  | 6.57066E-7  |
| B           | 4.00511   | 0.86936        | 2.24941   | 5.76081   | 5.89709   | 6.06068E-7  |
| C           | 3.84388   | 0.89965        | 2.02699   | 5.66077   | 5.65969   | 1.31758E-6  |
| B*B         | -3.06137  | 1.40374        | -5.89629  | -0.22645  | -4.50753  | 5.38022E-5  |
| A*B         | 1.47751   | 1.04153        | -0.6259   | 3.58092   | 2.17547   | 0.03541     |
| A*C         | -2.65921  | 1.07466        | -4.82954  | -0.48888  | -3.91539  | 3.33814E-4  |

#### Statistics

|                           | V_CQA_mass_in_Lungo |
|---------------------------|---------------------|
| Degress of Freedom        | 41                  |
| Root Mean Square of Error | 4.70541             |
| R-Square                  | 0.62163             |
| Adj. R-Square             | 0.56626             |
| Residual Sums of Squares  | 907.77565           |
| Predicted. R-Square       | 0.47747             |

#### ANOVA

|       | DF | Sum of Squares | Mean Square | F Value  | Prob>F     |
|-------|----|----------------|-------------|----------|------------|
| A     | 1  | 280.89518      | 280.89518   | 12.68673 | 9.50083E-4 |
| B     | 1  | 448.23595      | 448.23595   | 20.24473 | 5.51936E-5 |
| C     | 1  | 474.6465       | 474.6465    | 21.43757 | 3.65475E-5 |
| B*B   | 1  | 99.7486        | 99.7486     | 4.50518  | 0.03988    |
| A*B   | 1  | 52.31582       | 52.31582    | 2.36286  | 0.13194    |
| A*C   | 1  | 135.56664      | 135.56664   | 6.12291  | 0.01757    |
| Error | 41 | 907.77565      | 22.14087    |          |            |
| Total | 47 | 2399.18434     |             |          |            |

#### Fitted Plot

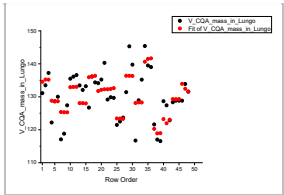

#### Residual Plot

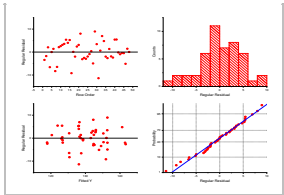

#### Effects Plot

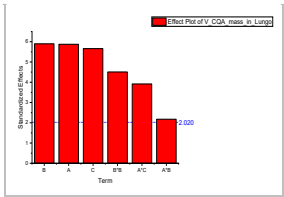

#### Main Effects Plot

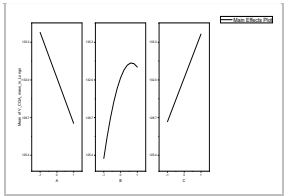

#### 2-way Interaction Plot

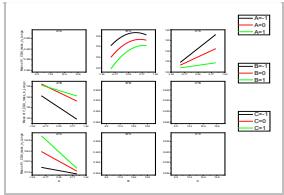

# 4.2 TDS - Ristretto

## Coded Coefficients

|             | Value    | Standard Error | 95% LCL  | 95% UCL  | t-Value   | Prob >  t   |
|-------------|----------|----------------|----------|----------|-----------|-------------|
| (Intercept) | 2.96292  | 0.02332        | 2.91579  | 3.01005  | 237.76419 | 1.20275E-64 |
| A           | -0.16404 | 0.01864        | -0.20171 | -0.12638 | -13.16369 | 4.0089E-16  |
| B           | 0.0152   | 0.01602        | -0.01718 | 0.04758  | 1.2197    | 0.22972     |
| C           | 0.09076  | 0.01831        | 0.05376  | 0.12776  | 7.28306   | 7.59026E-9  |
| A*A         | 0.0535   | 0.03354        | -0.01429 | 0.12129  | 4.293     | 1.0891E-4   |
| B*B         | -0.08229 | 0.03022        | -0.14336 | -0.02122 | -6.60325  | 6.71862E-8  |
| C*C         | 0.03206  | 0.03148        | -0.03157 | 0.09569  | 2.57275   | 0.01391     |
| A*B         | 0.0562   | 0.01939        | 0.01702  | 0.09538  | 4.50949   | 5.56724E-5  |

## Statistics

|                           | TDS_mass_in_Ristretto |
|---------------------------|-----------------------|
| Degress of Freedom        | 40                    |
| Root Mean Square of Error | 0.08634               |
| R-Square                  | 0.7835                |
| Adj. R-Square             | 0.74561               |
| Residual Sums of Squares  | 0.29816               |
| Predicted. R-Square       | 0.68656               |

## ANOVA

|       | DF | Sum of Squares | Mean Square | F Value   | Prob>F      |
|-------|----|----------------|-------------|-----------|-------------|
| A     | 1  | 0.76563        | 0.76563     | 102.71433 | 1.31075E-12 |
| B     | 1  | 0.0031         | 0.0031      | 0.41567   | 0.52279     |
| C     | 1  | 0.17323        | 0.17323     | 23.23928  | 2.09272E-5  |
| A*A   | 1  | 0.01593        | 0.01593     | 2.13669   | 0.15162     |
| B*B   | 1  | 0.05286        | 0.05286     | 7.09186   | 0.0111      |
| C*C   | 1  | 0.00563        | 0.00563     | 0.75591   | 0.3898      |
| A*B   | 1  | 0.06264        | 0.06264     | 8.403     | 0.00605     |
| Error | 40 | 0.29816        | 0.00745     |           |             |
| Total | 47 | 1.37717        |             |           |             |

## Fitted Plot

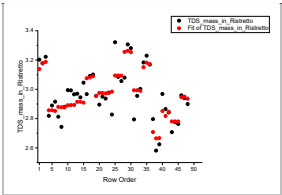

## Residual Plot

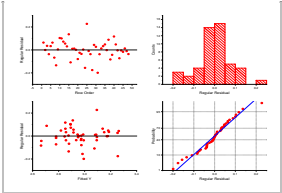

## Effects Plot

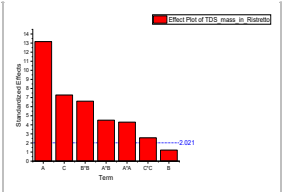

## Main Effects Plot

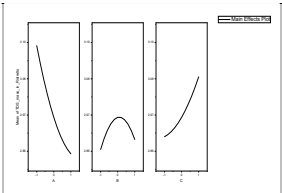

## 2-way Interaction Plot

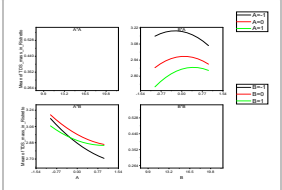

# 4.2 TDS - Espresso

## Coded Coefficients

|             | Value    | Standard Error | 95% LCL  | 95% UCL  | t-Value   | Prob >  t   |
|-------------|----------|----------------|----------|----------|-----------|-------------|
| (Intercept) | 3.92539  | 0.02949        | 3.86584  | 3.98494  | 239.40909 | 3.95065E-66 |
| A           | -0.13786 | 0.02243        | -0.18316 | -0.09256 | -8.40814  | 1.83557E-10 |
| B           | 0.04416  | 0.02096        | 0.00183  | 0.0865   | 2.69361   | 0.01019     |
| C           | 0.14428  | 0.02396        | 0.09588  | 0.19267  | 8.79936   | 5.44718E-11 |
| B*B         | -0.13301 | 0.0378         | -0.20934 | -0.05667 | -8.1121   | 4.65387E-10 |
| C*C         | 0.05332  | 0.03965        | -0.02676 | 0.13339  | 3.25175   | 0.0023      |
| A*B         | 0.06349  | 0.02512        | 0.01277  | 0.11421  | 3.87219   | 3.80091E-4  |

## Statistics

|                           | TDS_mass_in_Espresso |
|---------------------------|----------------------|
| Degress of Freedom        | 41                   |
| Root Mean Square of Error | 0.1136               |
| R-Square                  | 0.68971              |
| Adj. R-Square             | 0.6443               |
| Residual Sums of Squares  | 0.52907              |
| Predicted. R-Square       | 0.56044              |

## ANOVA

|       | DF | Sum of Squares | Mean Square | F Value  | Prob>F     |
|-------|----|----------------|-------------|----------|------------|
| A     | 1  | 0.44808        | 0.44808     | 34.72372 | 6.14873E-7 |
| B     | 1  | 0.03763        | 0.03763     | 2.91624  | 0.09525    |
| C     | 1  | 0.45402        | 0.45402     | 35.1845  | 5.41213E-7 |
| B*B   | 1  | 0.1306         | 0.1306      | 10.12062 | 0.00279    |
| C*C   | 1  | 0.02322        | 0.02322     | 1.79906  | 0.18721    |
| A*B   | 1  | 0.08246        | 0.08246     | 6.38988  | 0.01543    |
| Error | 41 | 0.52907        | 0.0129      |          |            |
| Total | 47 | 1.70506        |             |          |            |

## Fitted Plot

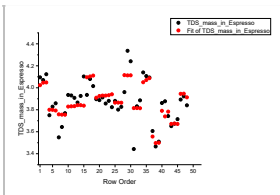

## Residual Plot

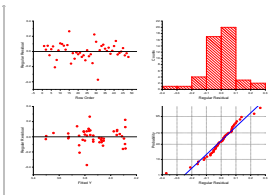

## Effects Plot

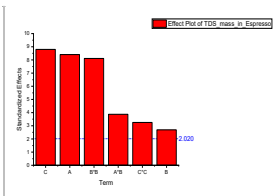

## Main Effects Plot

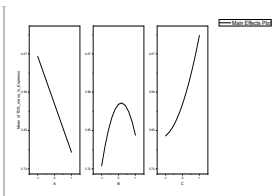

## 2-way Interaction Plot

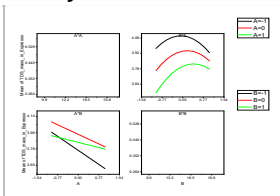

# 4.3 TDS - Espresso Lungo

## Coded Coefficients

|             | Value    | Standard Error | 95% LCL  | 95% UCL  | t-Value   | Prob >  t   |
|-------------|----------|----------------|----------|----------|-----------|-------------|
| (Intercept) | 4.22727  | 0.0351         | 4.15633  | 4.29821  | 216.77954 | 4.84199E-63 |
| A           | -0.10842 | 0.02697        | -0.16294 | -0.0539  | -5.55984  | 1.96247E-6  |
| B           | 0.05376  | 0.02497        | 0.00329  | 0.10423  | 2.75682   | 0.00875     |
| C           | 0.15812  | 0.02864        | 0.10023  | 0.216    | 8.10848   | 5.63771E-10 |
| B*B         | -0.16869 | 0.04499        | -0.25963 | -0.07775 | -8.65065  | 1.06076E-10 |
| C*C         | 0.06351  | 0.04733        | -0.03215 | 0.15917  | 3.25678   | 0.0023      |
| A*B         | 0.05925  | 0.0299         | -0.00119 | 0.11969  | 3.03848   | 0.00418     |
| A*C         | -0.05714 | 0.03097        | -0.11974 | 0.00545  | -2.93045  | 0.00557     |

## Statistics

|                           | TDS_mass_in_Lungo |
|---------------------------|-------------------|
| Degress of Freedom        | 40                |
| Root Mean Square of Error | 0.1351            |
| R-Square                  | 0.6357            |
| Adj. R-Square             | 0.57195           |
| Residual Sums of Squares  | 0.7301            |
| Predicted. R-Square       | 0.45019           |

## ANOVA

|       | DF | Sum of Squares | Mean Square | F Value  | Prob>F     |
|-------|----|----------------|-------------|----------|------------|
| A     | 1  | 0.22816        | 0.22816     | 12.50035 | 0.00105    |
| B     | 1  | 0.06771        | 0.06771     | 3.70978  | 0.06122    |
| C     | 1  | 0.59515        | 0.59515     | 32.60632 | 1.20736E-6 |
| B*B   | 1  | 0.21699        | 0.21699     | 11.88816 | 0.00134    |
| C*C   | 1  | 0.02561        | 0.02561     | 1.40283  | 0.24324    |
| A*B   | 1  | 0.07828        | 0.07828     | 4.28865  | 0.04486    |
| A*C   | 1  | 0.06214        | 0.06214     | 3.4044   | 0.07244    |
| Error | 40 | 0.7301         | 0.01825     |          |            |
| Total | 47 | 2.00414        |             |          |            |

## Fitted Plot

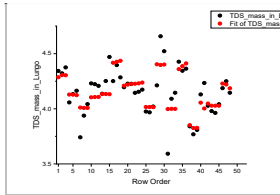

## Residual Plot

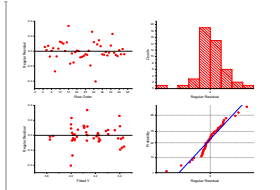

## Effects Plot

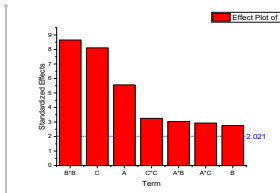

## Main Effects Plot

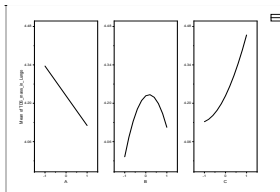

## 2-way Interaction Plot

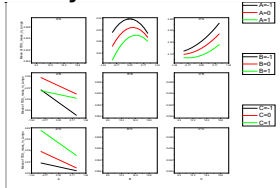

Supplement: s1 [file s1]
